# Supplementary material for: The circadian clock is associated with prognosis and immune infiltration in stomach adenocarcinoma
Source: PubMed Central journal article supplement (PMC8266362; doi:10.18632/aging.203184), 2021-06-23
Supplement: aging-13-203184-s001.pdf [file aging-13-203184-s001.pdf]

SUPPLEMENTARY FIGURES

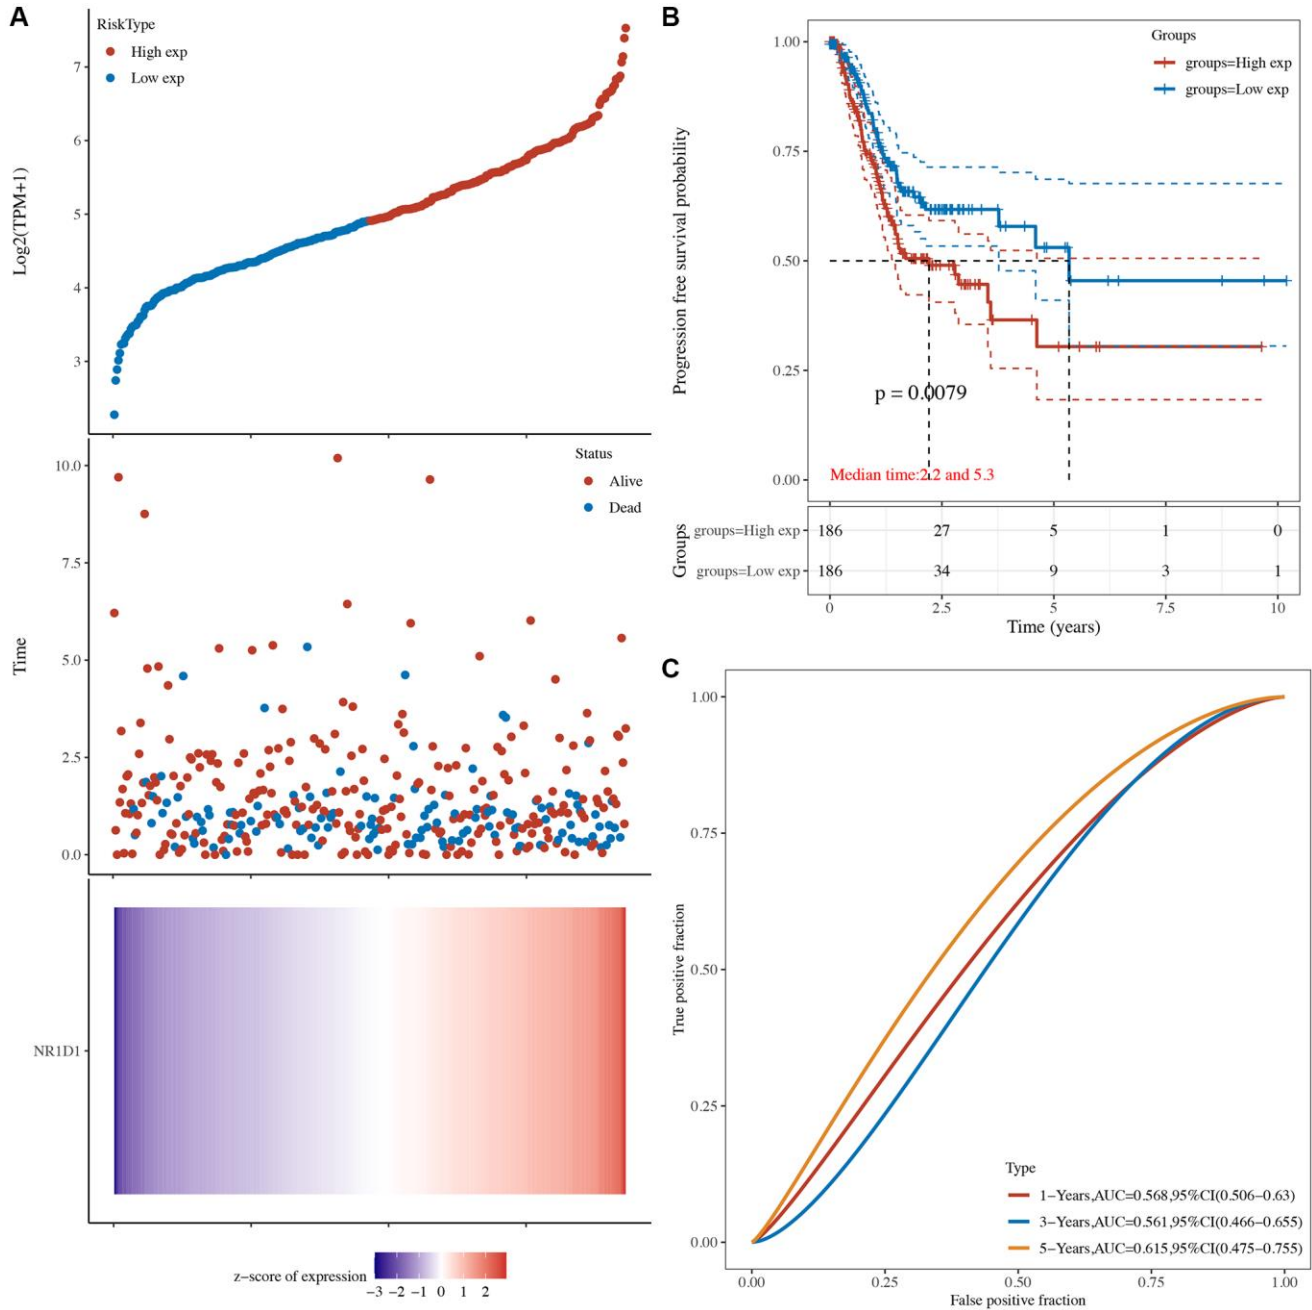

**Supplementary Figure 1. The progression free survival analysis of NR1D1 in STAD. (A)** The risk score, survival status and gene expression of each patient. **(B)** Kaplan-Meier progression free survival curve of NR1D1 in STAD patients with high and low NR1D1 expression. **(C)** Time-dependent ROC of P NR1D1 in predicting the prognosis of STAD patients. ROC receiver operating characteristic.

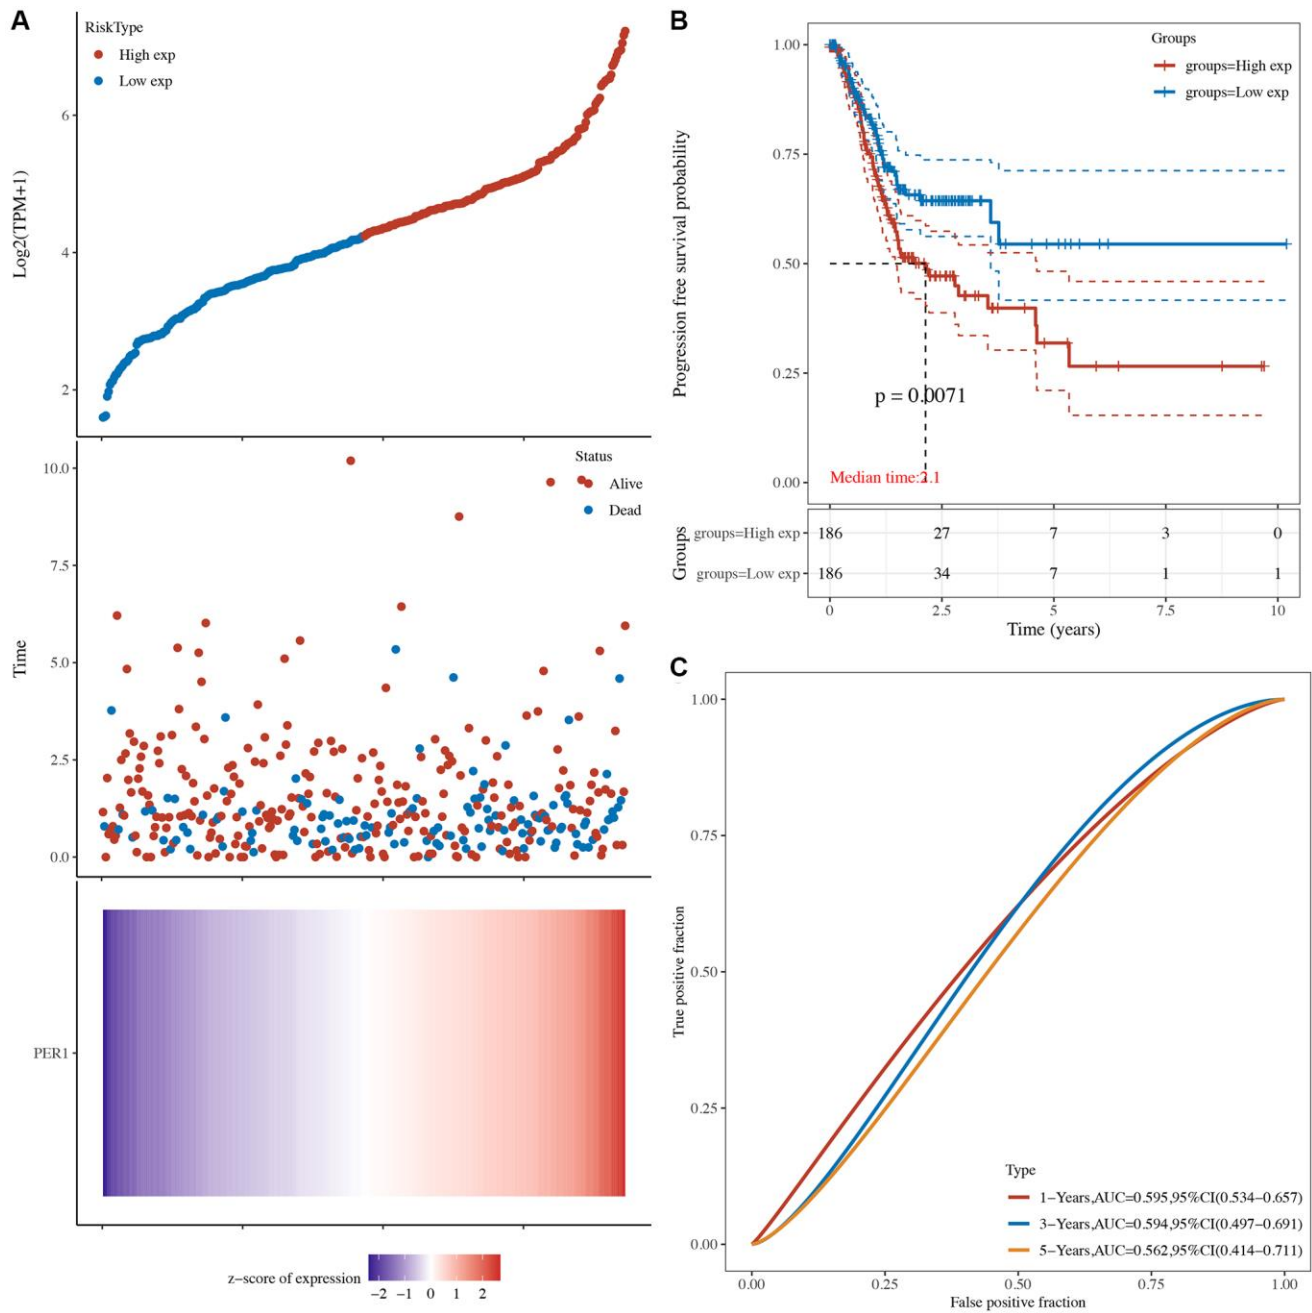

**Supplementary Figure 2. The progression free survival analysis of PER1 in STAD.** (A) The risk score, survival status and gene expression of each patient. (B) Kaplan-Meier progression free survival curve of PER1 in STAD patients with high and low PER1 expression. (C) Time-dependent ROC of PER1 in predicting the prognosis of STAD patients. ROC receiver operating characteristic.

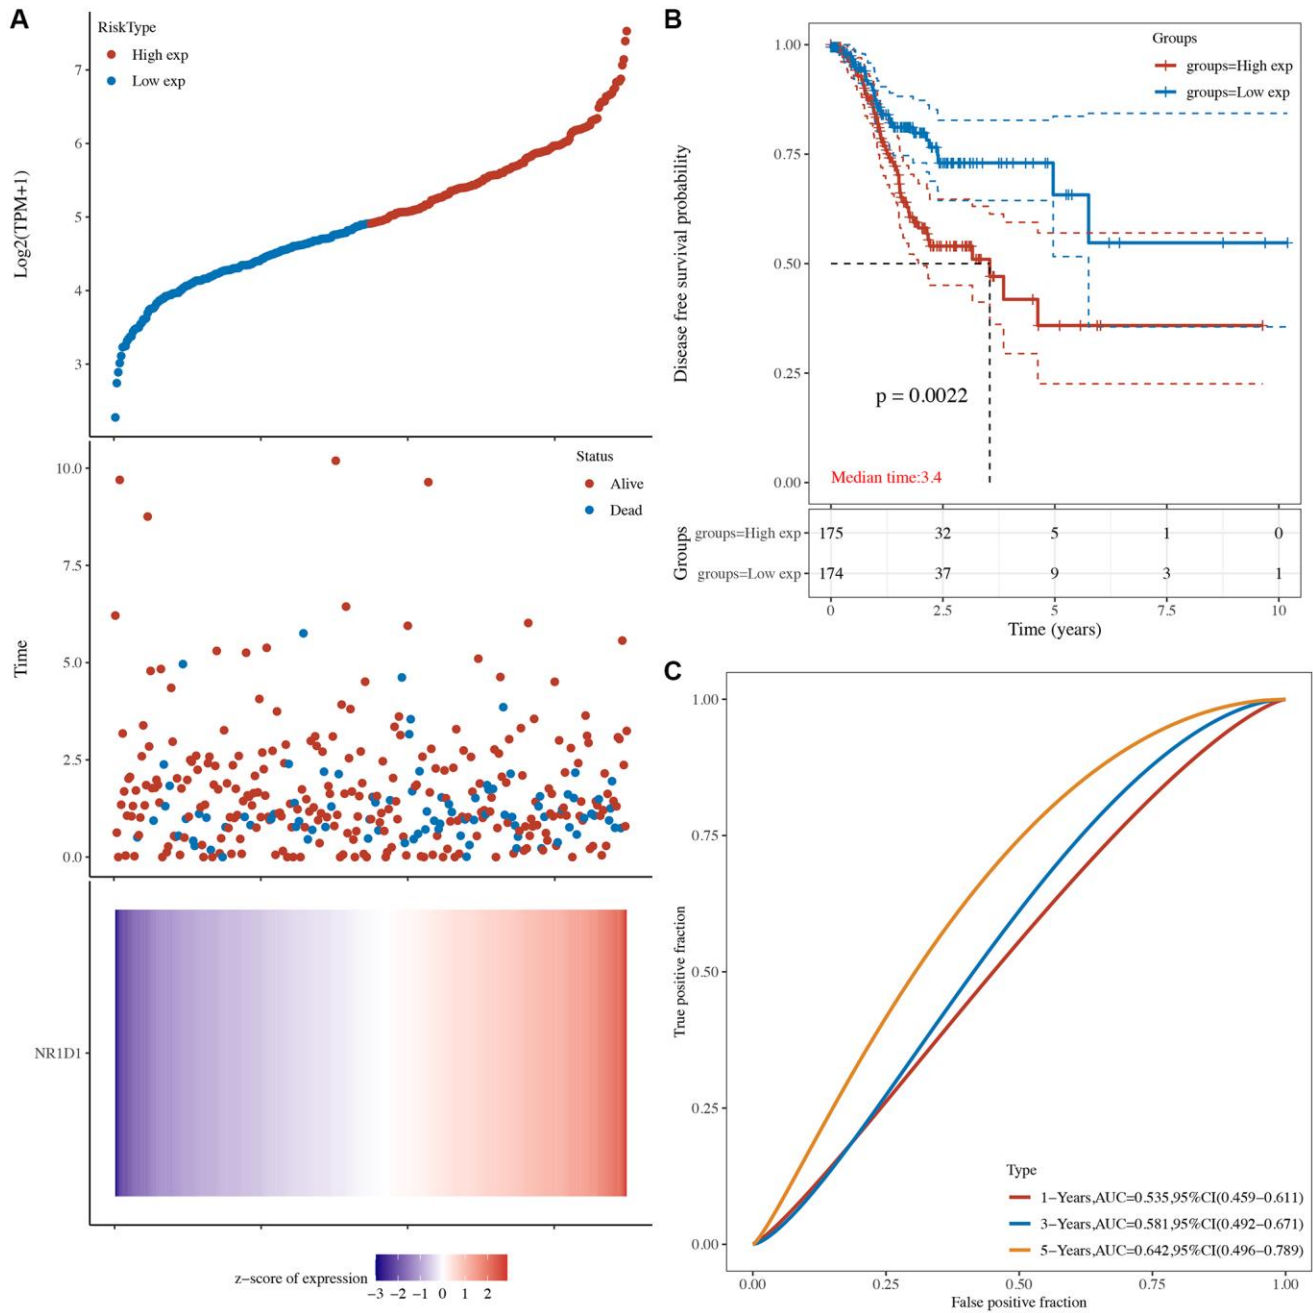

**Supplementary Figure 3. The disease-free survival analysis of NR1D1 in STAD.** (A) The risk score, survival status and gene expression of each patient. (B) Kaplan-Meier disease free survival curve of NR1D1 in STAD patients with high and low NR1D1 expression. (C) Time-dependent ROC of NR1D1 in predicting the prognosis of STAD patients. ROC receiver operating characteristic.

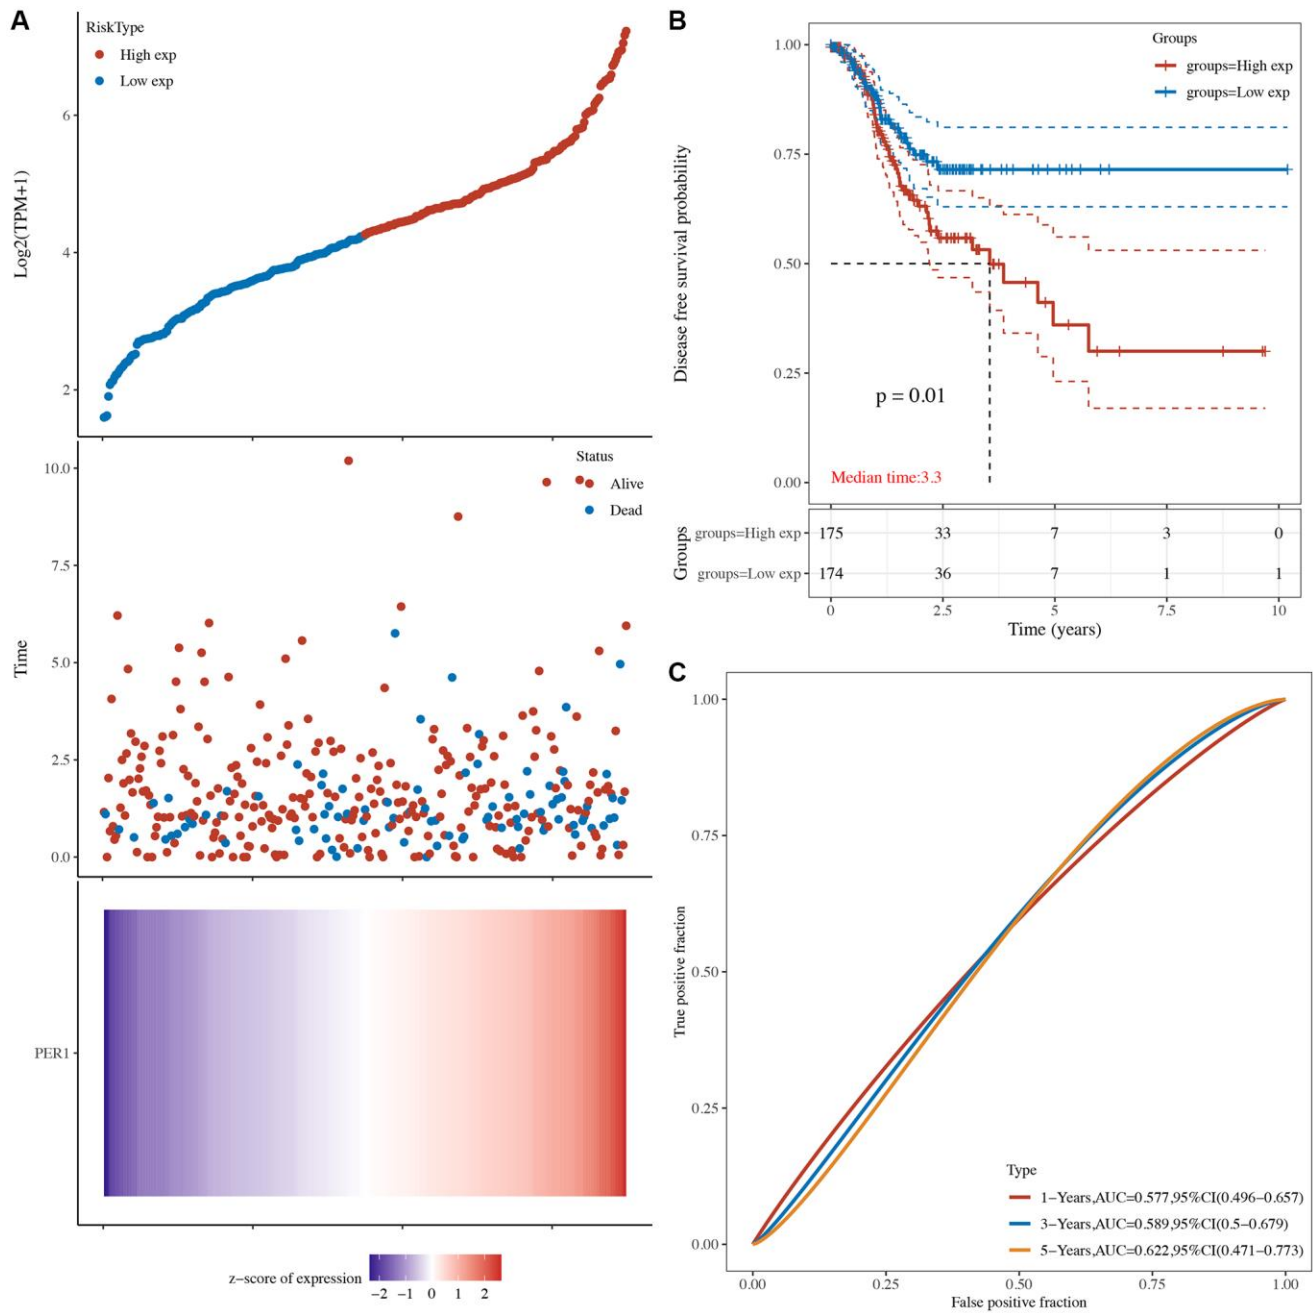

**Supplementary Figure 4. The disease-free survival analysis of PER1 in STAD. (A)** The risk score, survival status and gene expression of each patient. **(B)** Kaplan-Meier disease free survival curve of PER1 in STAD patients with high and low PER1 expression. **(C)** Time-dependent ROC of PER1 in predicting the prognosis of STAD patients. ROC receiver operating characteristic.
