# Supplementary material for: The circadian clock is associated with prognosis and immune infiltration in stomach adenocarcinoma
Source: PubMed Central journal article supplement (PMC8266362; doi:10.18632/aging.203184), 2021-06-23
Supplement: aging-13-203184-s002.pdf [file aging-13-203184-s002.pdf]

## SUPPLEMENTARY TABLE

Supplementary Table 1. Primer sequences for reverse transcription-quantitative polymerase chain reaction.

| Genes | Forward (5'–3')       | Reverse (5'–3')        |
|-------|-----------------------|------------------------|
| GAPDH | GCACCGTCAAGGCTGAGAAC  | TGGTGAAGACGCCAGTGA     |
| PER1  | GGACATGACCTCTGTGCTGA  | CATCAGGGTGACCAGGATCT   |
| NR1D1 | GCTAGACAGCCAGACAGCTAG | AGCGTCGCCACTGTACATGAGC |
